# Supplementary material
Source: Springer Nature journal article supplement (https://www.springermedizin.de/resource/supplementary/12943_2013_1490_MOESM4_ESM.pdf/9553180)

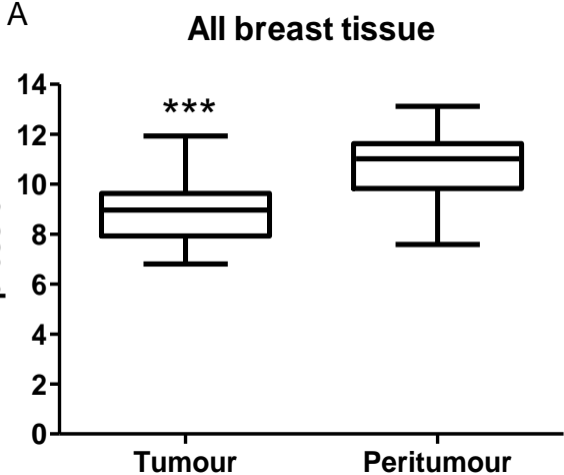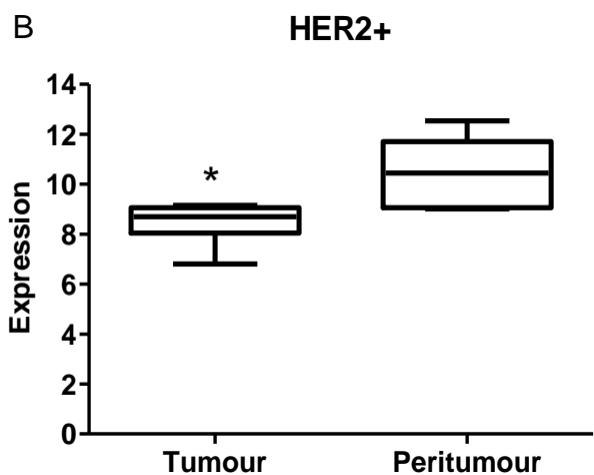

Supplement: MOESM4 [file 9553180]
